# Supplementary material for: Ampelopsin Suppresses Stem Cell Properties Accompanied by Attenuation of Oxidative Phosphorylation in Chemo- and Radio-Resistant MDA-MB-231 Breast Cancer Cells
Source: Pharmaceuticals (Basel). 2021 Aug 12;14(8):794. doi: 10.3390/ph14080794 (PMC8400665; doi:10.3390/ph14080794)
Supplement: Supplementary file 1 [file pharmaceuticals-14-00794-s001.zip › pharmaceuticals-1273522-supplementary.pdf]

## Supplementary Materials

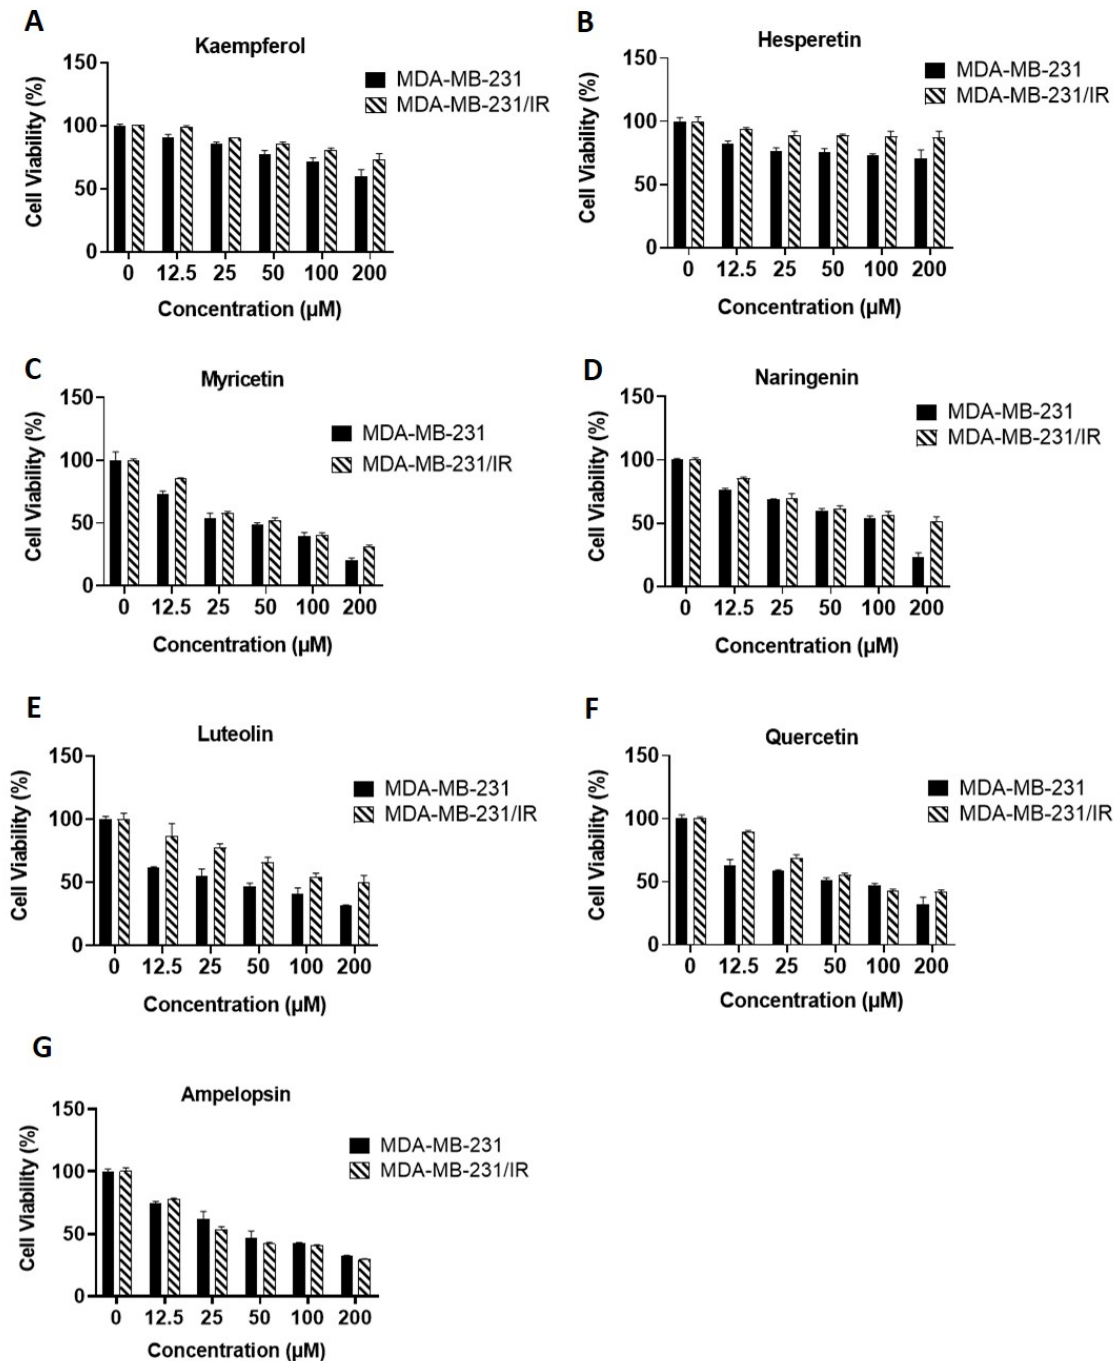

**Figure S1:** Effects of flavonoid compounds on viability of MDA-MB-231 and MDA-MB-231/IR cells. Effects on cell viability of incubation for 24 h with (A) kaempferol, (B) hesperetin, (C) myricetin, (D) naringenin, (E) luteolin, (F) quercetin and (G) ampelopsin were evaluated by MTT assay. Only ampelopsin had higher cytotoxicity in MDA-MB-231/IR cells than in MDA-MB-231 cells. Data are shown as means  $\pm$  standard deviations of three independent experiments.

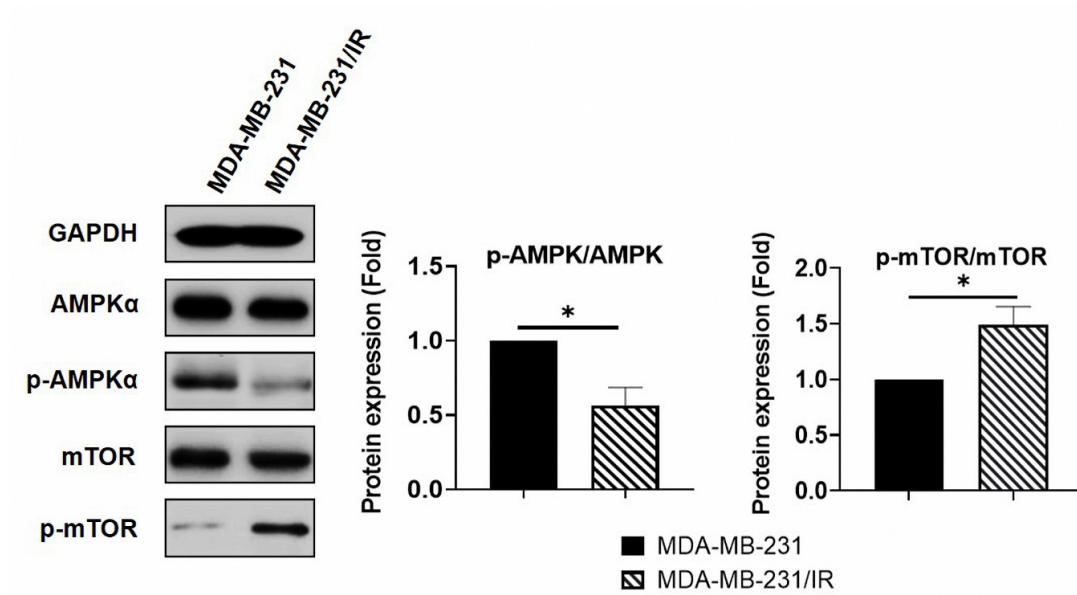

**Figure S2:** Expression of AMPK and mTOR in MDA-MB-231 and MDA-MB-231/IR cells determined by Western blotting analysis. MDA-MB-231/IR cells showed reduced AMPK activation and increased mTOR phosphorylation, compared with MDA-MB-231 cells. GAPDH was used as a control. Data are shown as means  $\pm$  standard deviations of three independent experiments. \* $p < 0.05$  vs. control.

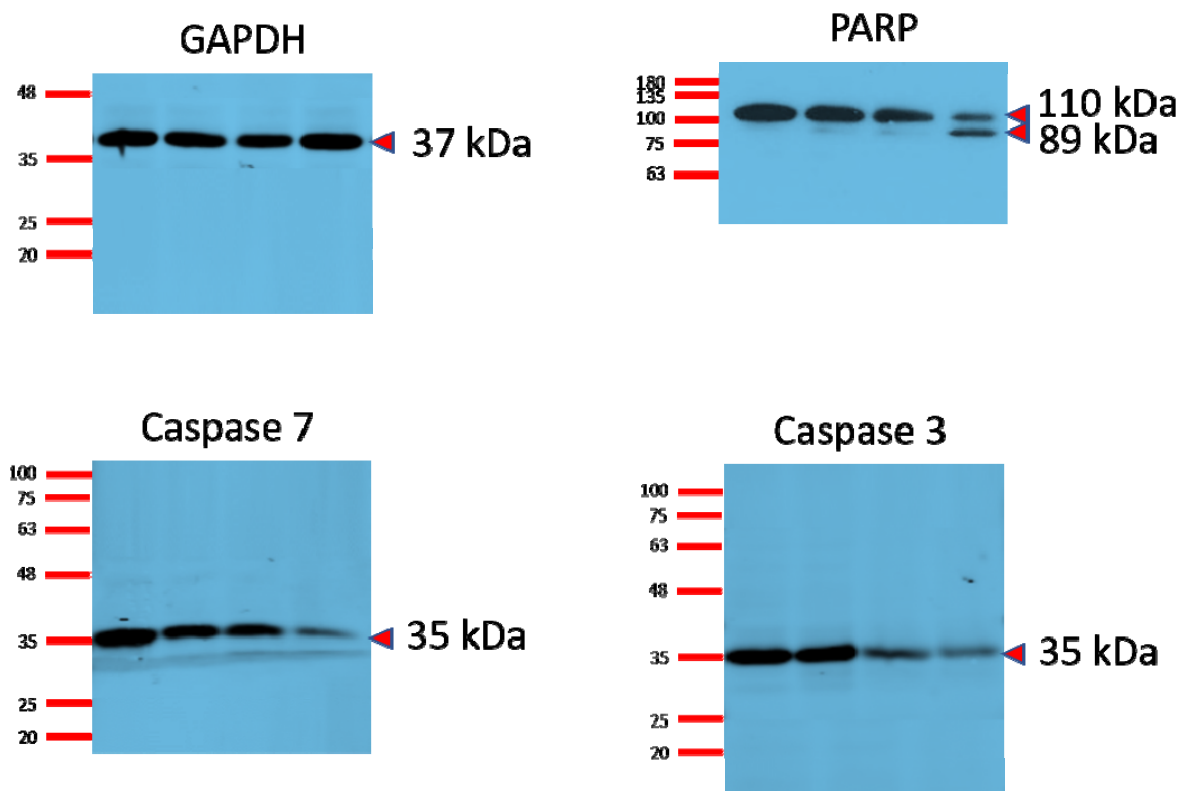

**Figure S3:** Original films of Figure 1D.

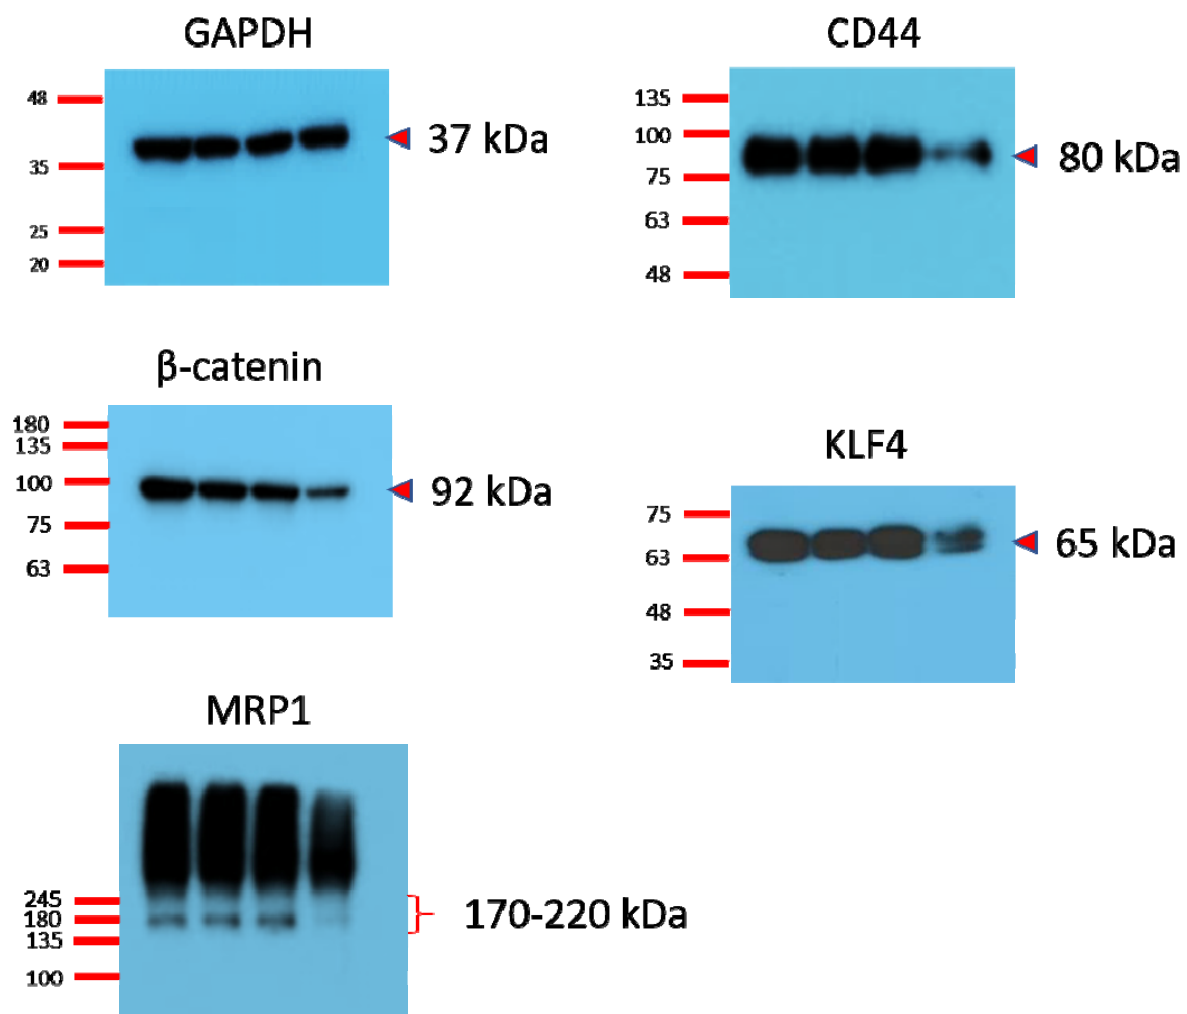

Figure S4: Original films of Figure 2D.

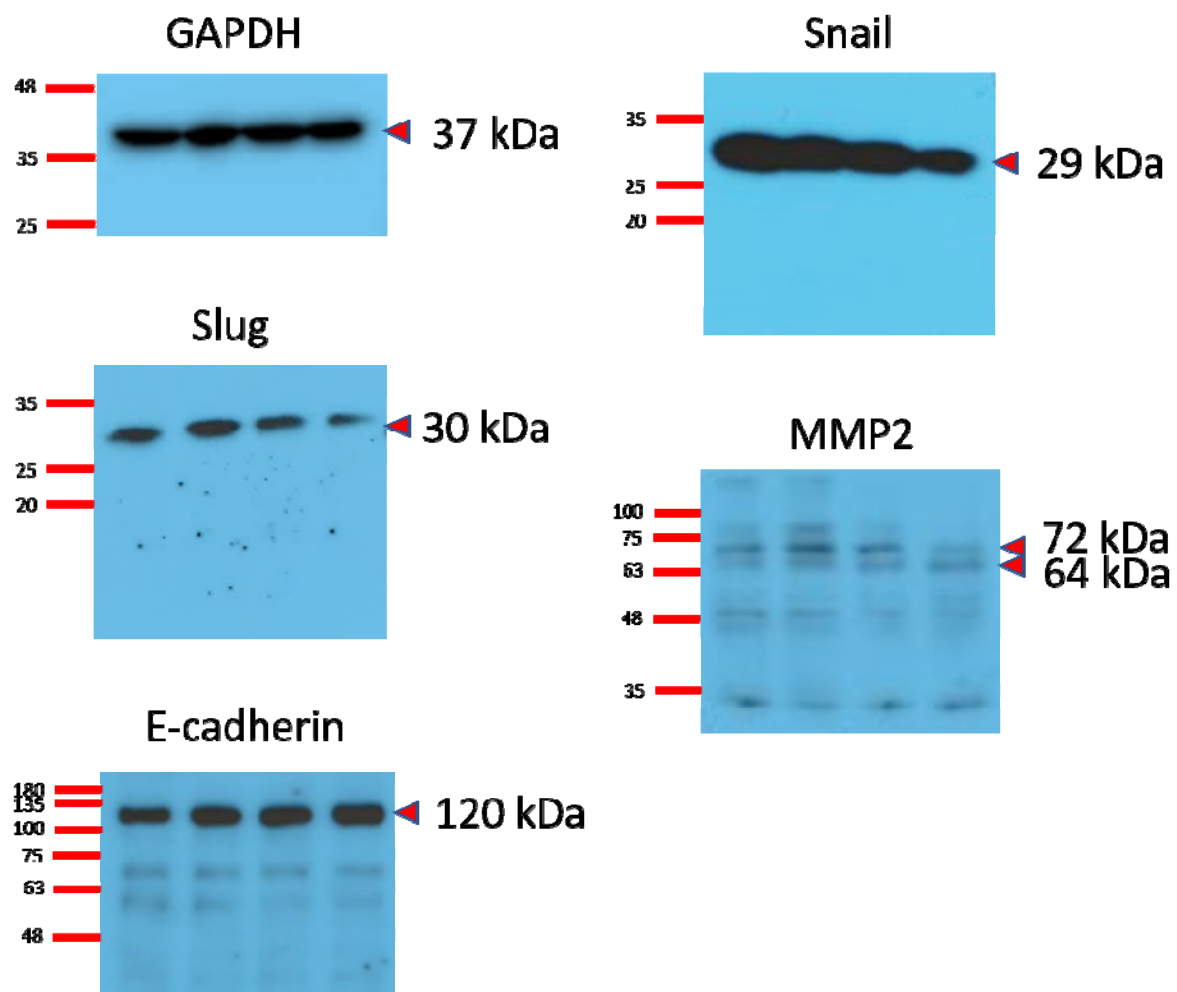

Figure S5: Original films of Figure 3C.

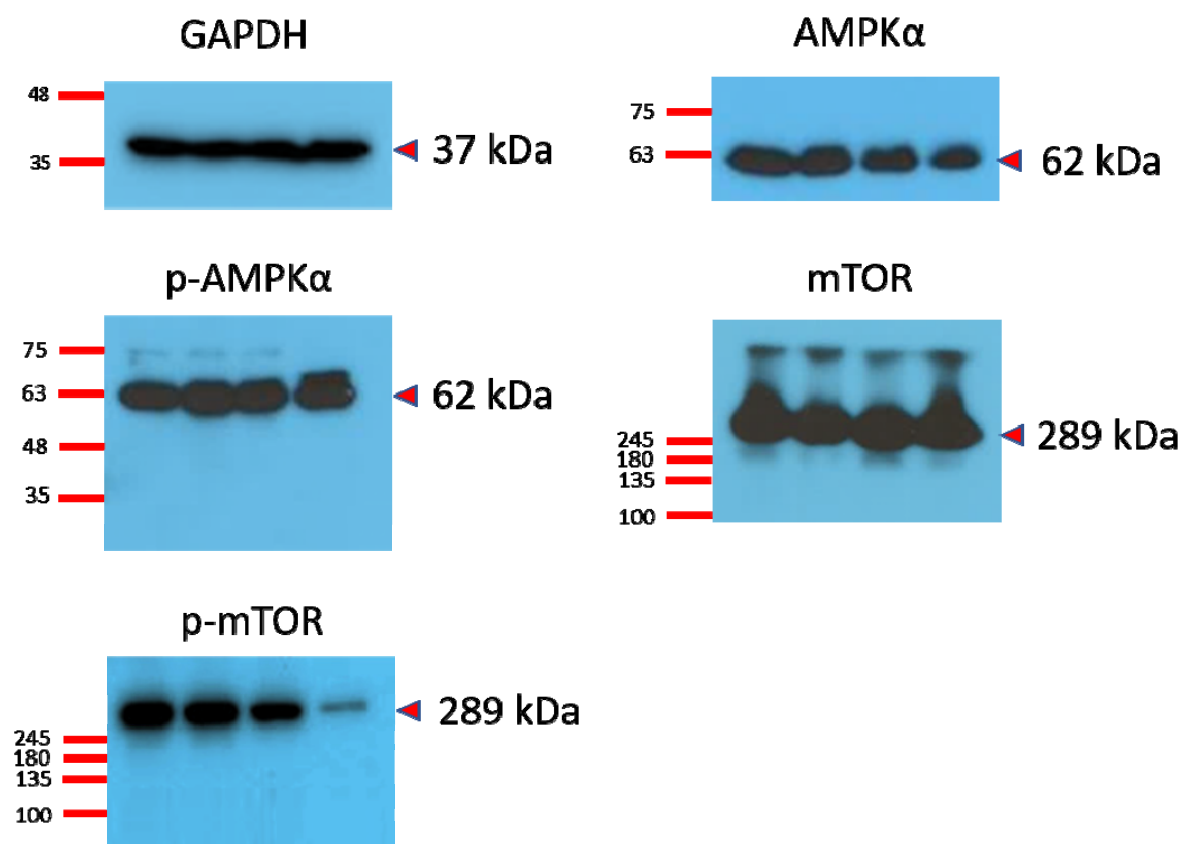

Figure S6: Original films of Figure 4A.

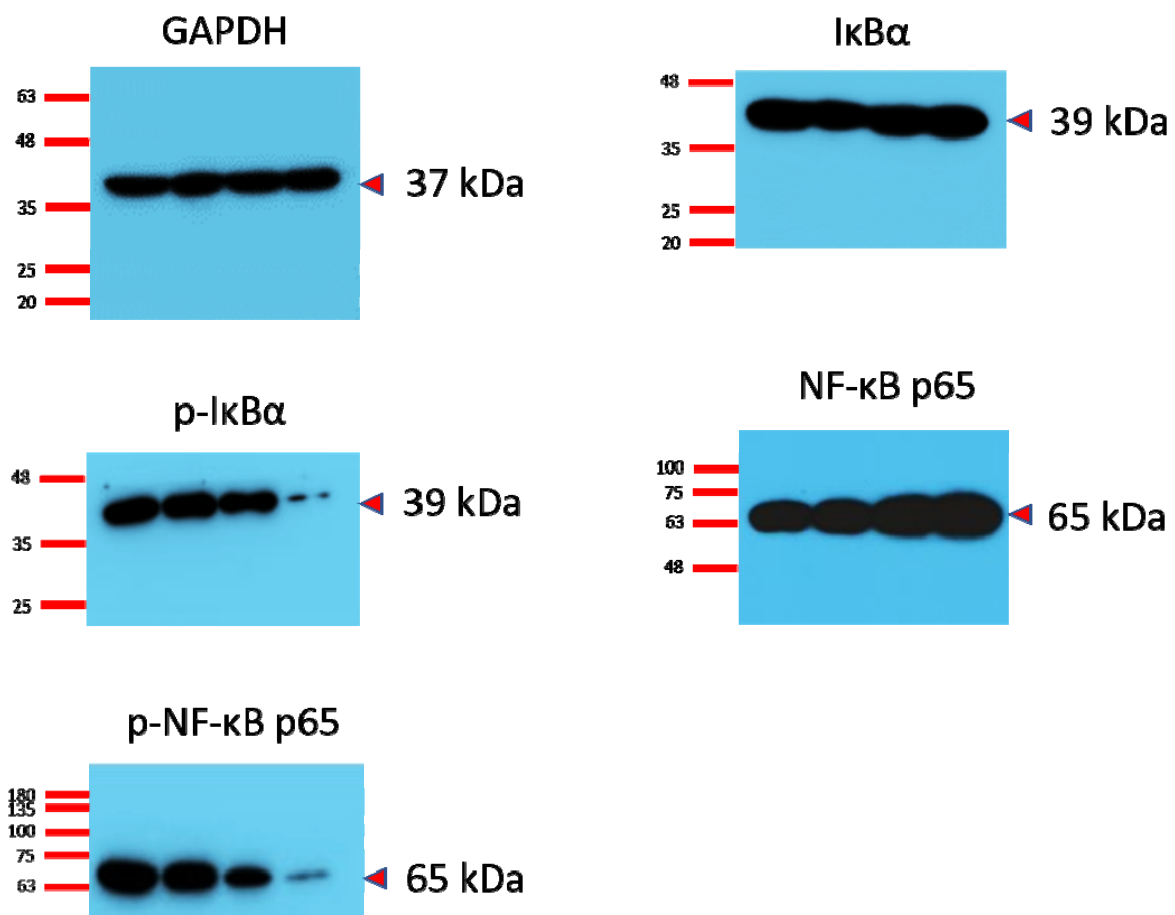

Figure S7: Original films of Figure 5A.

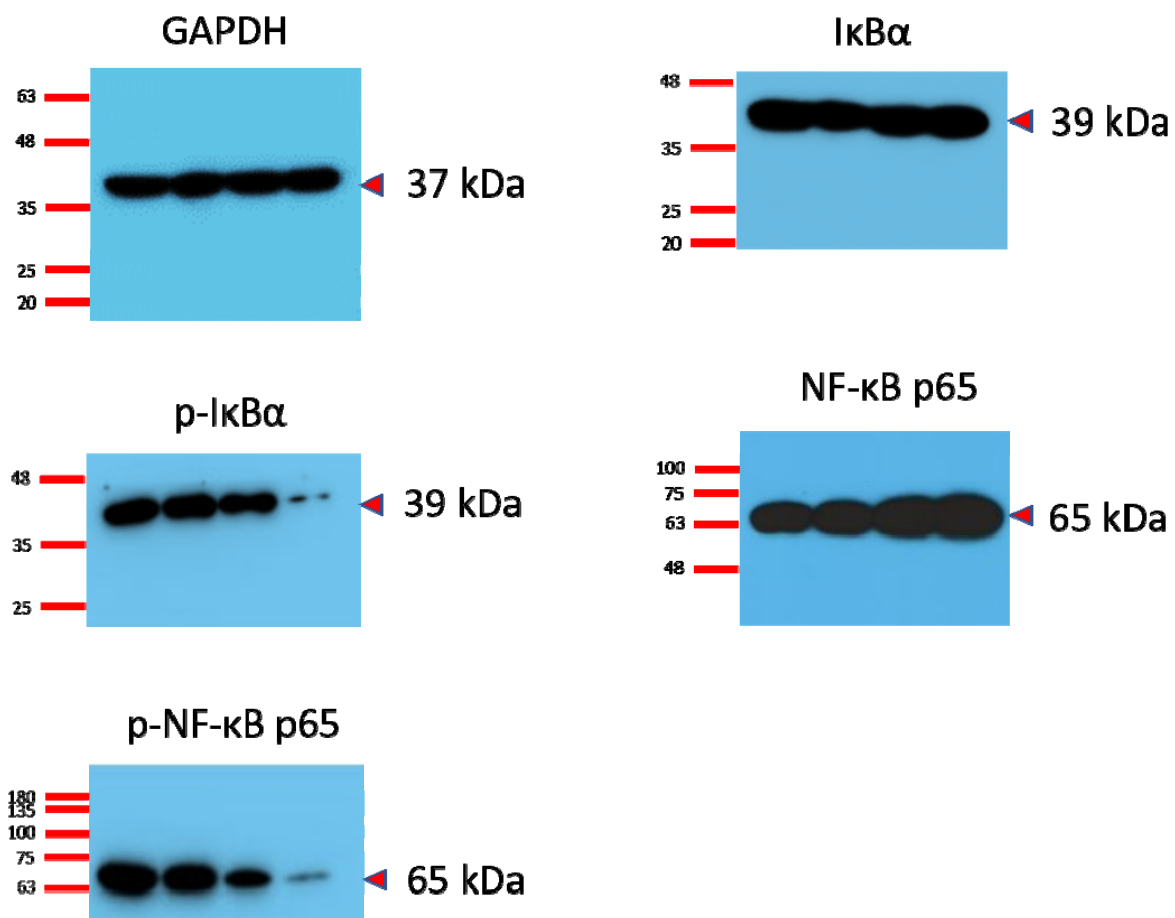

Figure S8: Original films of Figure 5B.

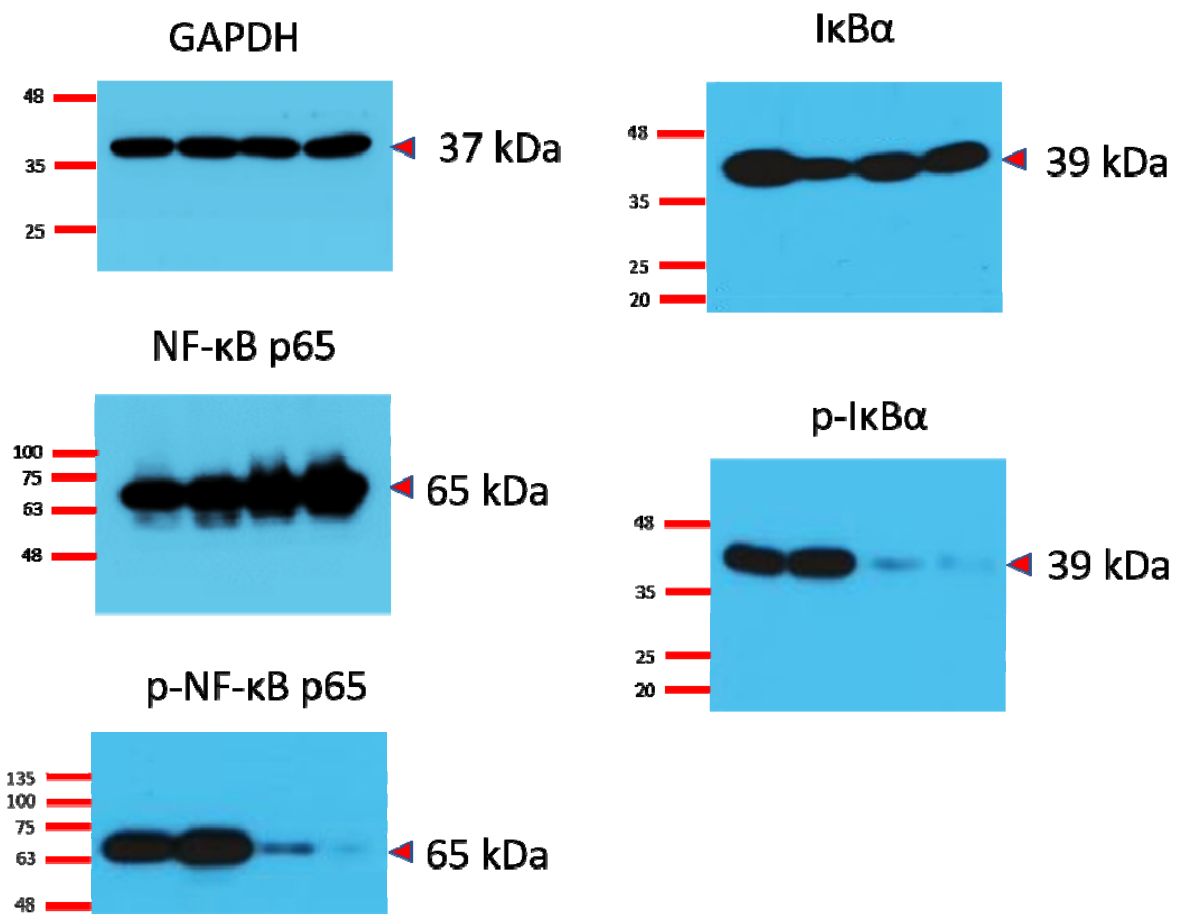

Figure S9: Original films of Figure 5C.

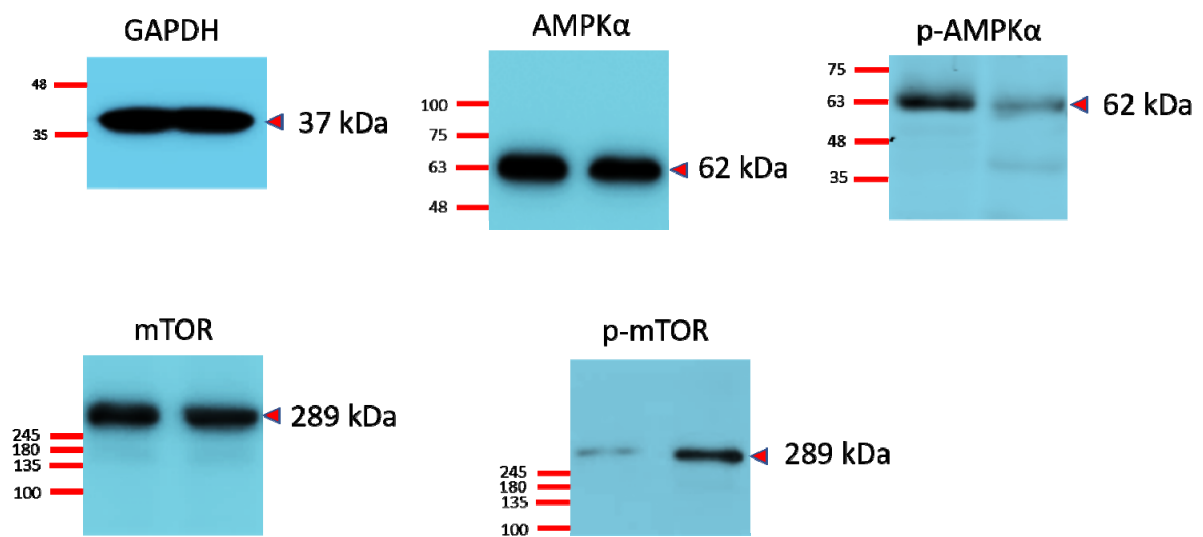

Figure S10: Original films of Figure S2.

**Table S1:** Primer sequences for OXPHOS-related genes.

| Gene           | Primer sequences                                               |
|----------------|----------------------------------------------------------------|
| NDUFA10        | 5'-CACCTGCGATTACTGGTTCAG-3'<br>5'-GCAGCTCTCTGAACTGATGTA-3'     |
| SDHB           | 5'-AGCCTTATCTGAAGAAGAAGG-3'<br>5'-TACTTGTCTCCGTTCCACCAG-3'     |
| COX5B          | 5'-CAGAAGGGACTGGACCCATA-3'<br>5'-TTCACAGATGCAGCCCACTA-3'       |
| COX4I1         | 5'-ACGAGCTCATGAAAGTGTGTG-3'<br>5'-AATGCGATACAACCTCGACTTTCTC-3' |
| ATP5G3         | 5'-GGATTTCCTTGTCTGAAGC-3'<br>5'-CGTACATCCCATGACACCA-3'         |
| SCO2           | 5'-TGGGTGCTGATGTACTTTGGC-3'<br>5'-ACAGTCTTGGGTGGAAGTCCTG-3'    |
| CYC1           | 5'-TAGAGTTTGACGATGGCACCC-3'<br>5'-CGTTTTTCGATGGTCGTGCTC-3'     |
| UQCRC1         | 5'-ACGGTGGGAGTGTGGATTGAC-3'<br>5'-CATTGCCAGGCCGATTCTTTG-3'     |
| ATP5B          | 5'-GGCACAATGCAGGAAAGG-3'<br>5'-TCGGCAGGCACATAGATAGCC-3'        |
| PGC1- $\alpha$ | 5'-TTCCACCAAGAGCAAGTAT-3'<br>5'-CGCTGTCCCATGAGGTATT-3'         |
